# Supplementary material for: Parametric analysis of entropy generation in a channel filled with a porous medium
Source: MDPI journal article supplement (doi:10.3390/cancers14143510), 2011-05-27
Supplement: s1 [file s1]

## Supplementary materials 2

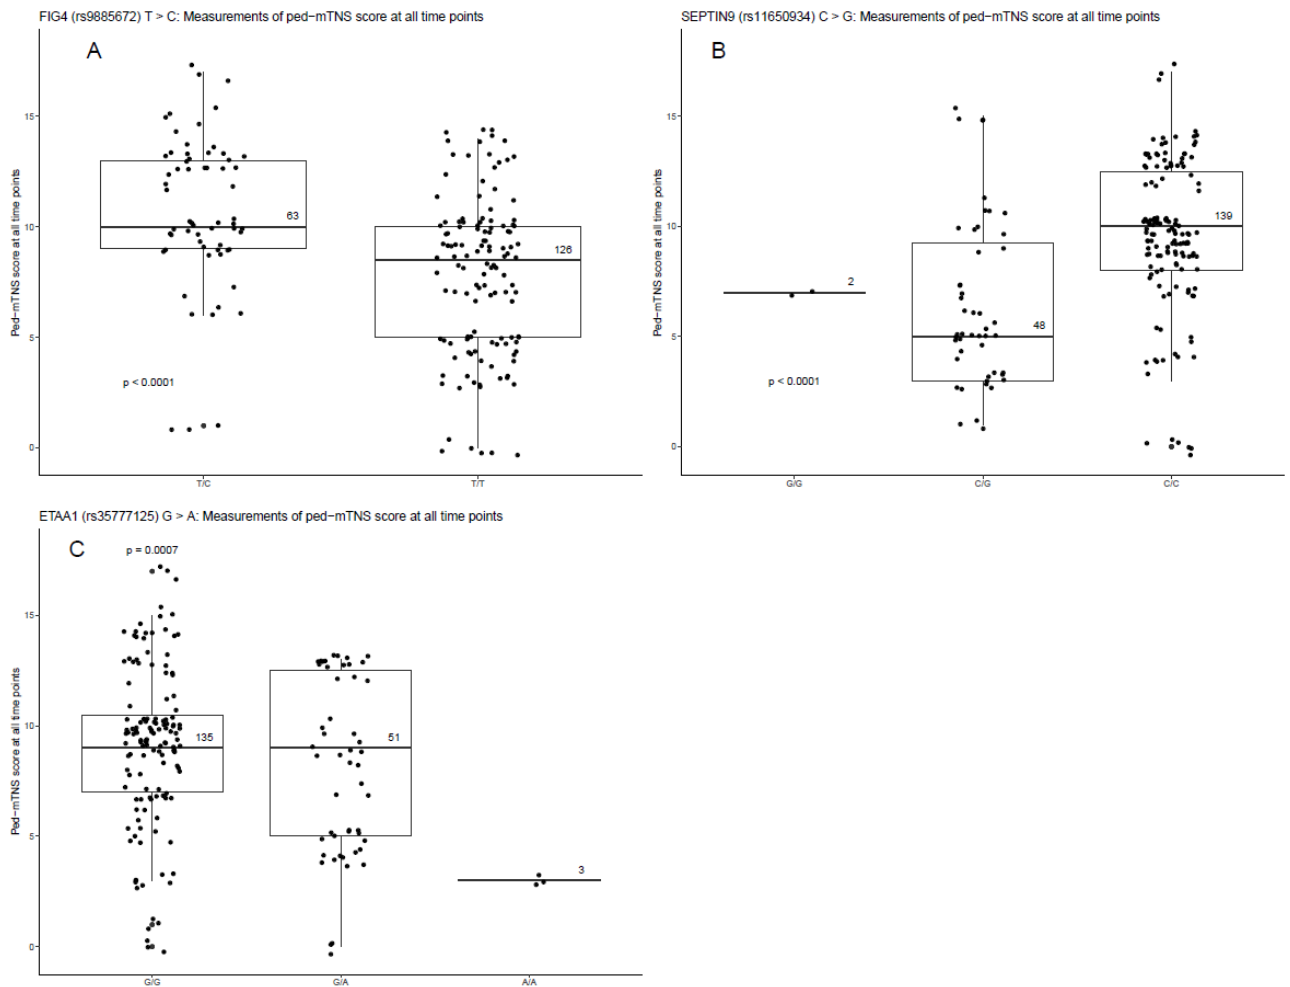

**Figure S1.** Genetic variants significantly associated with VIPN according to the CTCAE and ped-mTNS. VIPN measurements were performed 1-5 times in 85 patients. Every VIPN measurement per patient across the time points is shown. The number in the boxplot indicates the number of observations per genotype. The p-value was derived from Poisson regression analysis for repeated measures, where the genotype was considered as a categorical variable. FIG4: FIG4 Phosphoinositide 5-Phosphatase, SEPTIN9: Septin 9, CEP72: centrosomal protein 72, ETAA1: Ewing's tumor-associated antigen 1.

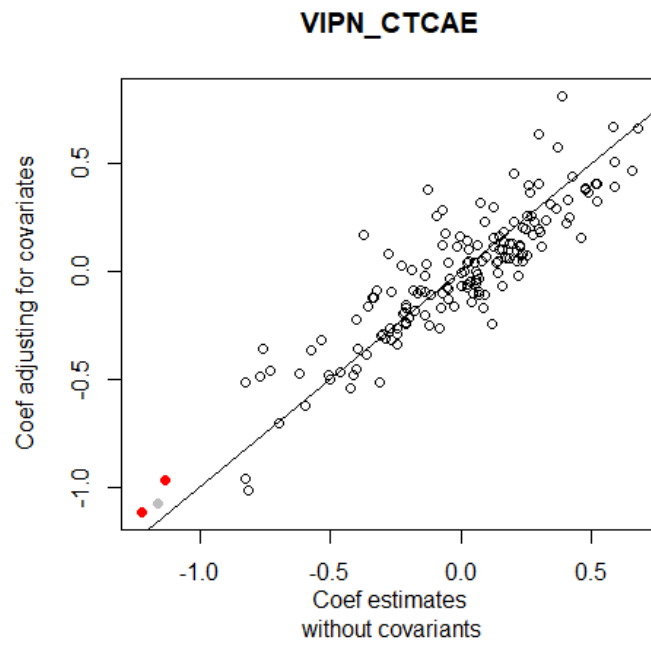

**Figure S2.** The estimates of the coefficients with and without adjusting for additional covariates (disease, cumulative VCR dosage and ancestry). Baseline CTCAE scores were included in both models. Red dots are SNP rs1049402 in GARS and SNP rs35777125 ETAA1, and the gray dots are two other ETAA1 SNPs pruned out.

**Table S1.** CADD and REVEL scores for all missense SNPs for predicted deleteriousness for protein function, delta score from SpliceAI for estimated impact on splicing and description of SNPs that are located in eQTL and their respective tissue types.

| Gene    | SNP        | Missense or non-coding | CADD score | REVEL score | Splice delta score | eQTL for respective gene | Tissue type for eQTL                          |
|---------|------------|------------------------|------------|-------------|--------------------|--------------------------|-----------------------------------------------|
| CEP72   | rs71585289 | Non-coding             | N.A.       | N.A.        | 0                  | No                       | N.A.                                          |
| ETAA1   | rs35777125 | Missense               | 0.04       | 0.05        | 0                  | Yes                      | Tibial artery, adipose (visceral), skin       |
| FGD4    | rs12823621 | Non-coding             | N.A.       | N.A.        | 0                  | No                       | N.A.                                          |
|         | rs73083501 | Non-coding             | N.A.       | N.A.        | 0                  | Yes                      | Thyroid, testis                               |
| FIG4    | rs9885672  | Missense               | 3.35       | 0.20        | 0                  | No                       | N.A.                                          |
|         | rs10659    | Non-coding             | N.A.       | N.A.        | 0                  | Yes                      | Heart                                         |
| GARS    | rs1049402  | Missense               | N.A.       | N.A.        | N.A.               | No                       | N.A.                                          |
| MTNR1B  | rs8192552  | Missense               | 3.42       | 0.28        | 0                  | No                       | N.A.                                          |
| NDRG1   | rs2272653  | Non-coding             | N.A.       | N.A.        | N.A.               | No                       | N.A.                                          |
| RAB7A   | rs4548     | Non-coding             | N.A.       | N.A.        | 0                  | No                       | N.A.                                          |
| SEPTIN9 | rs11650934 | Non-coding             | N.A.       | N.A.        | 0                  | No                       | N.A.                                          |
| SNU13   | rs6519270  | Non-coding             | N.A.       | N.A.        | N.A.               | Yes                      | Fibroblasts, lung, whole blood, muscle, brain |

CADD: Combined Annotation Dependent Depletion, REVEL: Rare Exome Variant Ensemble Learner, eQTL: expression quantitative trait loci.
